## The Northeast Regional Epilepsy Group,

a rapidly expanding clinical program with offices and hospital affiliations in New Jersey and New York, is seeking a neuropsychiatrist who trained and is interested in epilepsy.

We are a multidisciplinary team of epileptologists, neuropsychologists, nurse practitioners, and educational and vocational specialists. Duties would involve: psychiatric evaluations (presurgical and baseline), psychopharmacological management, and administration of clinical staff who provide psychotherapy. Must have NY and NJ licenses. Spanish speaking is a plus although not exclusionary. Research interests are strongly encouraged. Competitive salary and benefits.

Please send CV and two letters of reference to:

**Marcelo Lancman, M.D., Medical Director**  
Northeast Regional Epilepsy Group  
333 Westchester Avenue, Suite E104  
White Plains, NY 10604  
or email [marclanc@aol.com](mailto:marclanc@aol.com).  
For more information go to:  
[www.epilepsygroup.com](http://www.epilepsygroup.com)

## The American Psychiatric Publishing Textbook of Psychiatry, Fifth Edition

Edited by Robert E. Hales, M.D., M.B.A.,  
Stuart C. Yudofsky, M.D., and  
Glen O. Gabbard, M.D.

With Foreword by Alan F. Schatzberg, M.D.

An indispensable resource for clinical psychiatrists studying for Part I of the American Board of Psychiatry and Neurology exam, *The American Psychiatric Publishing Textbook of Psychiatry* is a proven teaching tool and an essential component of every practitioner's library.

2008 • 1,904 pages • ISBN 978-1-58562-257-3  
Hardcover • \$285.00 • Item #62257

Order Online: [www.appi.org](http://www.appi.org)  
Toll Free: 1-800-368-5777 • Fax: 703-907-1091  
Email: [appi@psych.org](mailto:appi@psych.org) Priority Code AH830

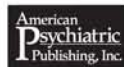

The First and Last Word in Psychiatry  
1000 Wilson Boulevard, Suite 1825, Arlington, VA 22209-3901

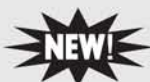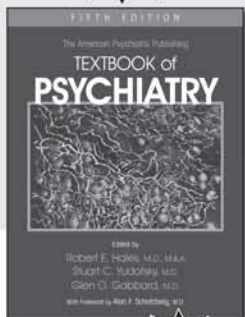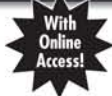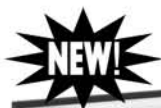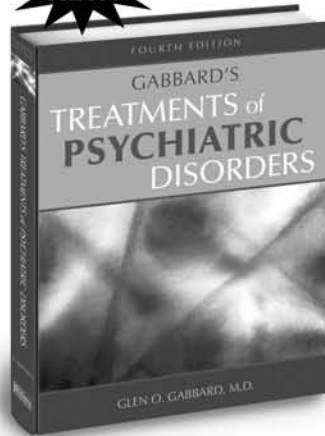

2007 • 986 pages  
ISBN 978-1-58562-216-0  
Hardcover • \$199.00

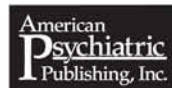

The First and Last Word  
in Psychiatry

PRIORITY CODE AH804

## Gabbard's Treatments of Psychiatric Disorders, Fourth Edition

Edited by Glen O. Gabbard, M.D.

First published in 1989 and already a staple of psychiatric practice through three editions, *Gabbard's Treatments of Psychiatric Disorders* has been thoroughly revised to reflect modern clinical expertise in a more accessible volume. More than 160 authorities share insights gained from firsthand experience in a state-of-the-art text that covers all major treatments in psychiatry linked to specific disorders, with a pluralistic approach that includes all major treatment modalities without focusing exclusively on favorite approaches. Not only has each chapter been completely updated, the text has been reorganized to facilitate its publication in a single volume that cuts directly to the heart of disorder-based treatments.

Scrupulously reviewed to consolidate treatment information most needed by readers, the book is organized along the lines of DSM-IV-TR to cover the entire spectrum of conditions:

disorders of childhood; cognitive disorders; substance-related disorders; psychotic disorders; mood disorders; anxiety, dissociative, and adjustment disorders; somatoform and factitious disorders; eating disorders; personality disorders; sleep disorders; and disorders of impulse control.

Empirically validated treatments for each disorder are summarized; where empirical data are lacking, the contributors' clinical wisdom is brought to bear to advise the reader how to approach a particular condition.

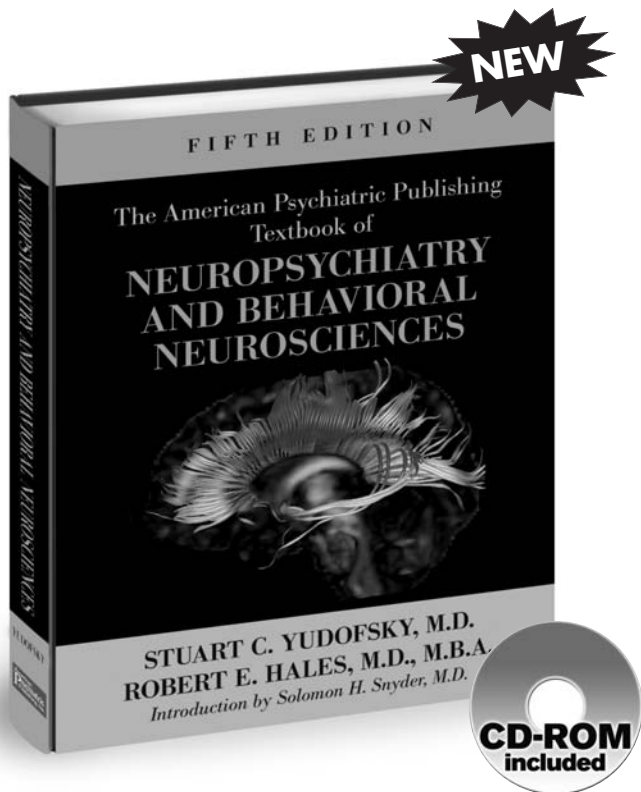

# The Fifth Edition of The American Psychiatric Publishing Textbook of Neuropsychiatry and Behavioral Neurosciences

Stuart C. Yudofsky, M.D., and Robert E. Hales, M.D., M.B.A.

With Introduction by Solomon H. Snyder, M.D.

Since the publication of the Fourth Edition of this *Textbook* six years ago, we have continued to witness explosive growth in our knowledge base in structural and functional brain imaging, electrophysiology and electrodiagnosis, cellular and molecular biology, genetics, and neuropsychopharmacology—to name just a few. To convey this intensified focus in neurosciences and to acknowledge the recognition by the American Neuropsychiatric Association and by the United Council for Neurological Subspecialties of new subspecialty status in neuropsychiatry and behavioral neurology, the editors have

added “*Behavioral Neurosciences*” to the title of this seminal work, while increasing its already impressive clinical utility and practicality. Among the many highlights of the Fifth Edition are:

- An extensively updated chapter on the cellular and molecular biology of the neuron
- An expanded chapter on the epidemiology and genetics of neuropsychiatric disorders
- An extensively revised and expanded chapter on the neuropsychiatric aspects of delirium
- A comprehensive revision and expansion of the chapter on clinical and functional neuroimaging

In this volume’s five main sections, you’ll find *basic principles of neuroscience, assessment, symptomatologies, neuropsychiatric disorders, and neuropsychiatric treatments*

### CD-ROM Included!

The accompanying CD in PowerPoint presentation format contains a wealth of material to enhance classroom presentation, study, and clinical use. It includes all 170 tables and all 250 figures, many in color, with their explanatory legends, easy to access and organized chapter by chapter with context provided—plus, Highlights for the Clinician summarizing the key clinical points for each chapter; locator menus; useful links; and a topic outline.

2008 • 1,344 pages • ISBN 978-1-58562-239-9 • Hardcover • \$275.00 • Item #62239

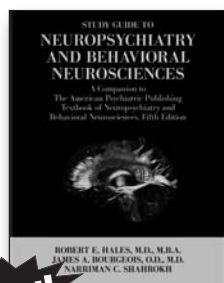

## Study Guide to Neuropsychiatry and Behavioral Neurosciences

A Companion to The American Psychiatric Publishing Textbook of Neuropsychiatry and Behavioral Neurosciences, Fifth Edition

Robert E. Hales, M.D., M.B.A.,  
James A. Bourgeois, O.D., M.D., and  
Narriman C. Shahrokh

through the corresponding textbook. The *Study Guide* is made up of 246 questions divided into individual quizzes of 5-10 questions each that correspond to chapters in *The American Psychiatric Publishing Textbook of Neuropsychiatry and Behavioral Neurosciences*, Fifth Edition. Questions are followed by an Answer Guide that references relevant text (including the page number) in the *Textbook* to allow quick access to needed information. Each answer is accompanied by a discussion that addresses not only the correct response but also explains why other responses are not correct.

2008 • 224 pages • ISBN 978-1-58562-303-7 • Paperback

\$49.00 • Item #62303

*Study Guide to Neuropsychiatry and Behavioral Neurosciences* is a question-and-answer companion that allows you to evaluate your mastery of the subject matter as you progress

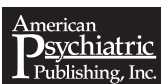

To order Call: **1-800-368-5777** or visit our website: **www.appi.org**

Please reference priority code AH837 when ordering.

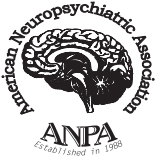

# American Neuropsychiatric Association

## ABOUT ANPA

The American Neuropsychiatric Association (ANPA), established in 1988, is an organization of professionals in neuropsychiatry and the clinical neurosciences. Our mission is to apply neuroscience for the benefit of people. We work together in a collegial fashion to advance knowledge of brain-behavior relations, provide a forum for learning, and promote excellent, scientific and compassionate care.

The strength of the organization is our diversity of membership, which is comprised of professionals in neuropsychiatry, behavioral neurology, neuropsychology, neuroradiology, neuropathology, and neurosurgery as well as the basic neurosciences, who share clinical and/or academic interests in neuropsychiatry. The interdisciplinary nature of the membership encourages collaborations among educators, clinicians, researchers, students and trainees in research presentations, symposia, workshops and/or continuing education courses. Students, fellows and other trainees are encouraged to participate and are offered discount membership and conference fees. The *Journal of Neuropsychiatry and Clinical Neurosciences (JNP)* is the official publication of the organization, and is a benefit of membership.

ANPA holds its annual scientific meeting in the early spring, and provides up to 30 CME / CE credits. Joint meetings with the International Neuropsychological Society, the British Neuropsychiatry Association, and the International Neuropsychiatry Congresses have added an international dimension to the ANPA conferences. Members are encouraged to submit their work for presentation at these annual meetings. Travel awards are available for promising young investigators. Annual meeting abstracts and proceedings are published in *JNP*.

In 1999 the designation of Fellow of the American Neuropsychiatric Association was established in recognition of special achievement in neuropsychiatry, behavioral neurology, neuropsychology or the clinical neurosciences.

In 2001 the ANPA Career Development Award Program was instituted. It recognizes advanced trainees in psychiatry, neurology, or neuropsychology whose accomplishments during training offer promise of a successful career in neuropsychiatry and the clinical neurosciences. The award will support costs associated with participation in two consecutive Annual Meetings, establish an informal mentoring relationship between the awardee and one ANPA Fellow and facilitate the awardee's involvement in ANPA.

ANPA has been actively engaged in efforts toward creation of subspecialty certification for neuropsychiatry including developing a core curriculum and guidelines for training in neuropsychiatry. In March 2004, a joint application from ANPA and the Society for Behavioral and Cognitive Neurology (SBCN) was submitted to the Unified Council for Neurologic Subspecialties (UCNS) for recognition of the Neurological Subspecialty Area (NSA) of Behavioral Neurology & Neuropsychiatry ([www.ucns.org](http://www.ucns.org)). On June 30, 2004 Behavioral Neurology & Neuropsychiatry was approved as a single subspecialty. The first certification exam in Behavioral Neurology & Neuropsychiatry took place in September 2006.

## BENEFITS OF MEMBERSHIP

- Subscription to the *Journal of Neuropsychiatry and Clinical Neurosciences (JNP)*
- Opportunities for presentation at the annual meeting with accepted abstracts published in the JNP
- Significantly reduced registration fees at the annual meeting
- Regular mailings including newsletters, information about job opportunities and pertinent information about upcoming meetings
- Discounted membership fees for trainees
- Collaboration in clinical, educational and research activities and the opportunity to interact with senior colleagues
- Extensive Bibliography in Neuropsychiatry
- Reduced journal subscription rates from related organizations
- Complimentary web site listings of job and training opportunities

## ANPA COMMITTEES

**The Education Committee** The ANPA Education Committee supports efforts related to education and practice of high quality care and research in neuropsychiatry. They have developed a model curriculum and standards for accreditation of neuropsychiatry fellowship programs. The committee has developed and maintains an updated bibliography of neuropsychiatry-relevant references.

**The Membership Committee** recruits new members for ANPA, reviews applications of all potential members, oversees collection of yearly membership dues, reviews Fellow applications and hosts a new member events at the annual ANPA meeting.

**The Research Committee** reviews and publishes articles on research issues in neuropsychiatry. They have developed a Research Registry that can be accessed through the ANPA website. Past projects include position statements on the clinician-scientist in neuropsychiatry, and topical reviews.

**The Scientific Program Committee** plans the ANPA Annual Meeting.

**The Website Committee** The ANPA website is located at [www.anpaonline.org](http://www.anpaonline.org).

### JOIN ANPA NOW!

**You can now join online at: [www.anpaonline.org](http://www.anpaonline.org)**

Candidates should have an interest in the field of clinical neuroscience.

Dues: \$175 regular membership \$70 members in training

#### **More information**

Mail: ANPA, 700 Ackerman Rd., Ste 625, Columbus, OH 43202

Website: [www.anpaonline.org](http://www.anpaonline.org)

Email: [anpa@osu.edu](mailto:anpa@osu.edu)

Phone: 614-447-2077

Fax: 614-263-4366

SAN ANTONIO

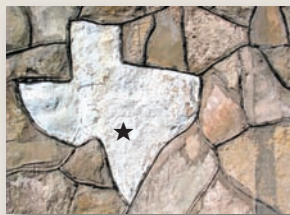

TEXAS

**AMERICAN NEUROPSYCHIATRIC ASSOCIATION**  
**20TH ANNUAL MEETING**  
**THE WESTIN RIVERWALK**  
**FEBRUARY 18-22, 2009**

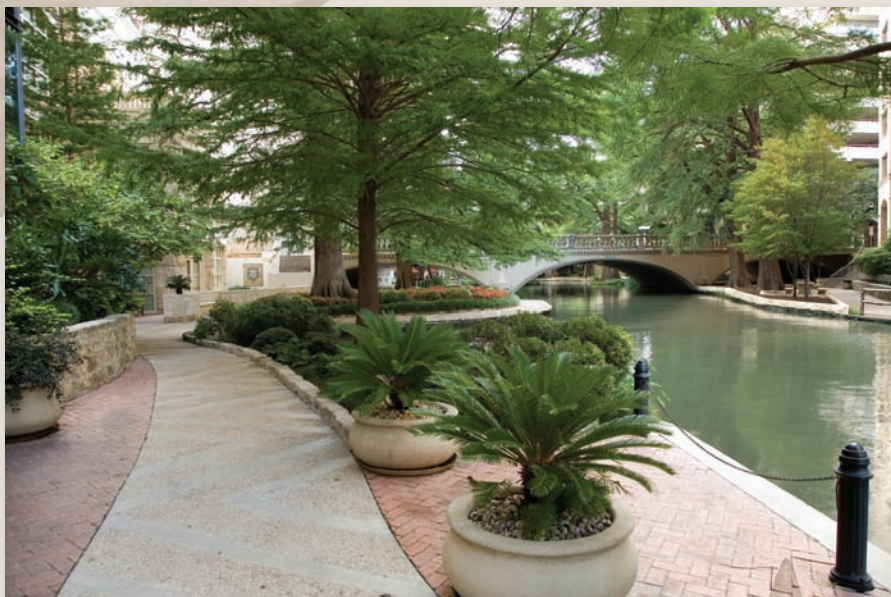

★ **CALL FOR ABSTRACTS**

You are invited to submit abstracts reporting new research for poster sessions, platform presentations or interactive breakout sessions.

Accepted abstracts for poster sessions will be published on-line in the spring 2009 issue of the Journal of Neuropsychiatry and Clinical Neuroscience.

Travel awards will be given to one or more of the young investigators submitting the most promising abstracts.

*Deadline for receipt of abstracts is October 22, 2008.*

*Complete submissions instructions will be available June 1, 2008 at: [www.anpaonline.org](http://www.anpaonline.org)*

Meeting and award information can be found on the ANPA web site: [www.anpaonline.org](http://www.anpaonline.org) as it becomes available.

For more information contact Sandy Bornstein at the ANPA Central Office

700 Ackerman Road, Suite 625  
Columbus, Ohio USA 43202  
Phone: 614-447-2077  
E-mail: [anpa@osu.edu](mailto:anpa@osu.edu)

★ **SAN ANTONIO, 2009**

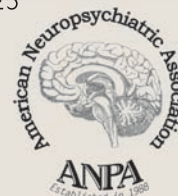

Source: https://neuro.psychiatryonline.org/doi/suppl/10.1176/jnp.2008.20.issue-2/suppl_file/back.pdf
