# THE JOURNAL OF NEUROPSYCHIATRY and Clinical Neurosciences

The Official Journal of the American Neuropsychiatric Association

## In this issue:

- An Evidence-Based Review of the Psychopathology of Frontotemporal Dementia and Related Syndromes: A Report of the ANPA Committee on Research
- Comparability of the Clinical Diagnostic Criteria for Vascular Dementia: A Critical Review. Part I.
- Validity of the Clinical Diagnostic Criteria for Vascular Dementia: A Critical Review. Part II.
- Double-Blind Randomized Treatment of Poststroke Depression Using Nefiracetam
- A New Data-Based Motor Subtype Schema for Delirium

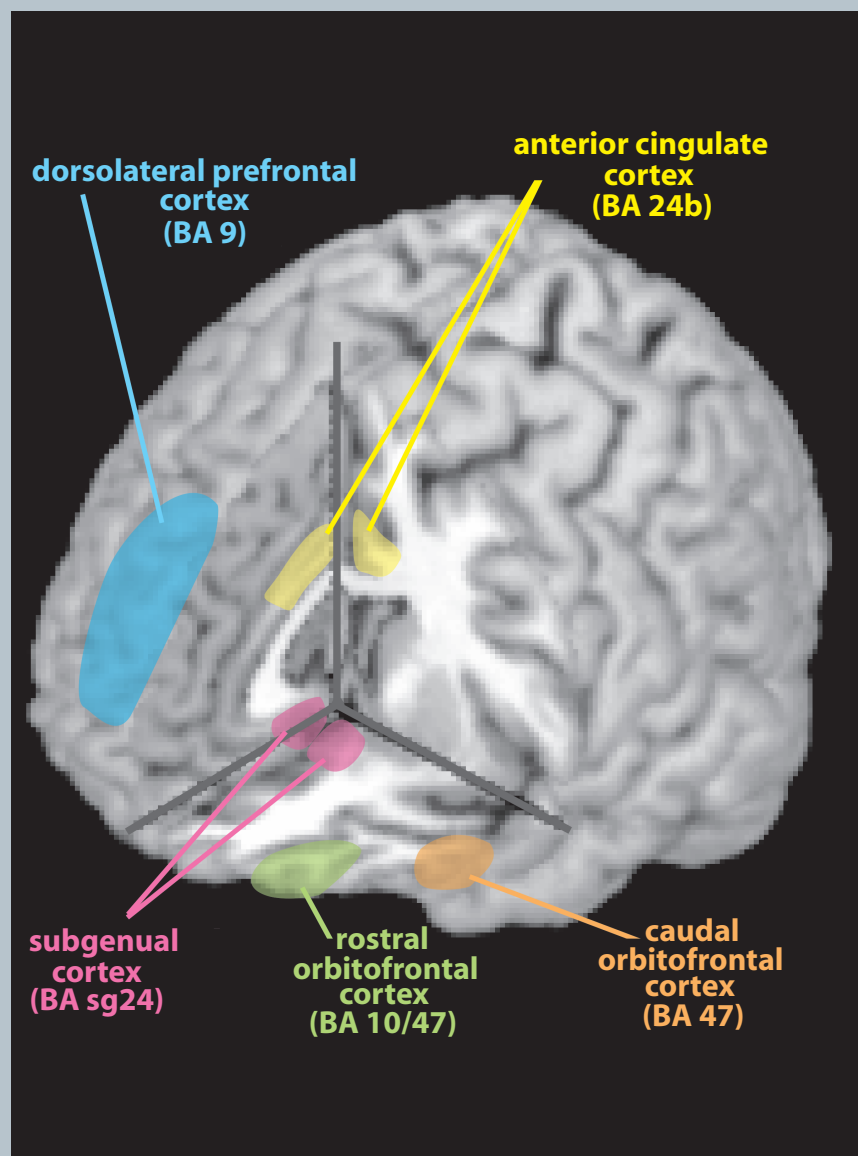

Source: https://neuro.psychiatryonline.org/doi/suppl/10.1176/jnp.2008.20.issue-2/suppl_file/cover.pdf
